# Supplementary material for: Biomarker potential of repetitive-element transcriptome in lung cancer
Source: PubMed Central journal article supplement (PMC6925957; doi:10.7717/peerj.8277), 2019-12-19
Supplement: peerj-07-8277-s001.pdf [file peerj-07-8277-s001.pdf]

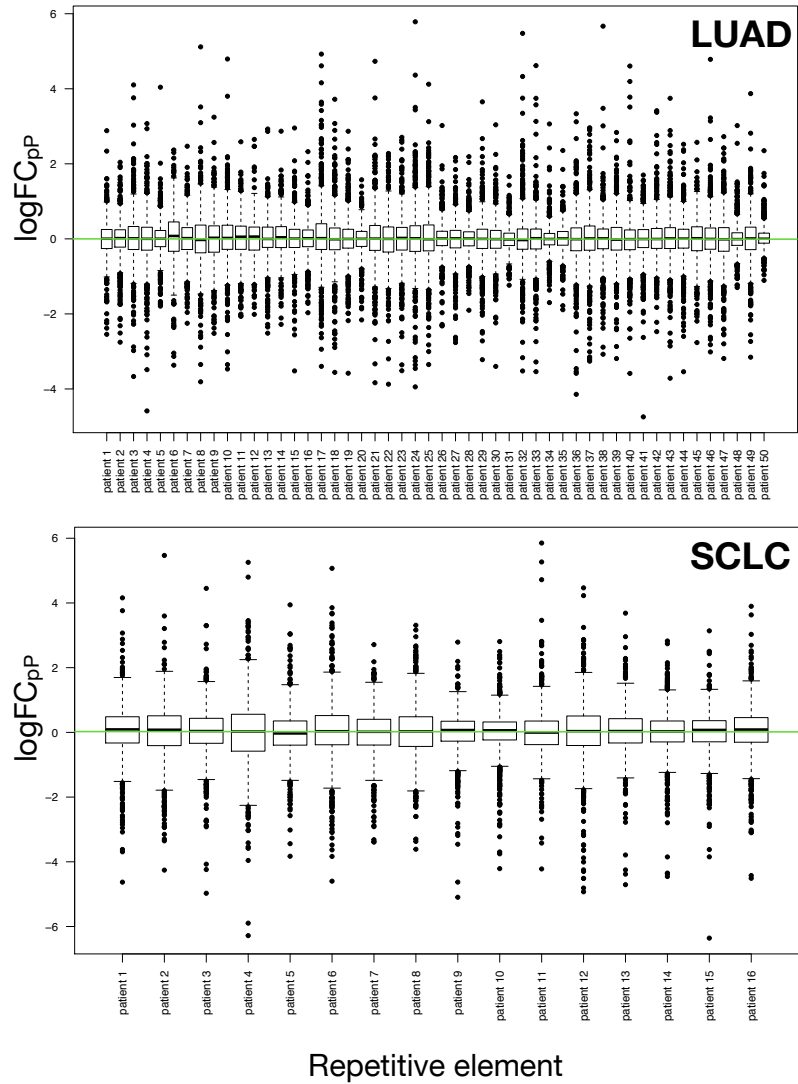

**Figure S1.** Overall RE expression change per patient. For LUAD (upper panel) and SCLC (lower panel), the  $\log FC_{pP}$  (ordinate) of all REs in each patient (abscissa) are represented.  $\log FC = 0$  is marked with a green line to show that the overall level of RE expression can be considered unchanged in each patient after an oncogenic process.
