# Supplementary material for: Biomarker potential of repetitive-element transcriptome in lung cancer
Source: PubMed Central journal article supplement (PMC6925957; doi:10.7717/peerj.8277), 2019-12-19
Supplement: peerj-07-8277-s002.pdf [file peerj-07-8277-s002.pdf]

**Table S1.** Name, class and family of differentially expressed REs when normal lung from SCLC is compared with normal lung from LUAD. Positive  $\log FC_{OE}$  values indicate up-regulation in normal cells of SCLC, while negative values indicate up-regulation in normal cells of LUAD samples.

| RE              | Class   | Family       | $\log FC_{OE}$ | FDR      |
|-----------------|---------|--------------|----------------|----------|
| 7SLRNA          | srpRNA  | srpRNA       | 2.33           | 3.56e-33 |
| LTR7A           | LTR     | ERV1         | 2.25           | 5.22e-29 |
| 7SK             | RNA     | RNA          | 2.16           | 1.98e-26 |
| MER11B          | LTR     | ERVK         | 1.97           | 4.13e-24 |
| ERV24B.Prim-int | LTR     | ERV1         | 1.73           | 1.97e-11 |
| LTR6A           | LTR     | ERV1         | 1.52           | 1.98e-33 |
| UCON50          | Unknown | Unknown      | 1.34           | 1.90e-09 |
| LTR25-int       | LTR     | ERV1         | 1.33           | 1.84e-51 |
| LTR54B          | LTR     | ERV1         | 1.28           | 2.77e-19 |
| MER65-int       | LTR     | ERV1         | 1.25           | 1.76e-10 |
| L1PA6           | LINE    | L1           | 1.17           | 3.81e-13 |
| AluYb8          | SINE    | Alu          | 1.17           | 4.03e-20 |
| MER134          | DNA?    | DNA?         | 1.15           | 2.10e-17 |
| LTR82A          | LTR     | ERVL         | 1.10           | 1.98e-26 |
| UCON6           | Unknown | Unknown      | 1.09           | 3.61e-24 |
| L1P4d           | LINE    | L1           | 1.07           | 6.47e-07 |
| MER75A          | DNA     | PiggyBac     | 1.06           | 5.63e-07 |
| Eulor2C         | DNA?    | DNA?         | 1.06           | 0.00     |
| MER132          | DNA     | TcMar-Pogo   | 1.05           | 0.00     |
| Ricksha_a       | DNA     | MULE-MuDR    | 1.04           | 7.43e-08 |
| L1M4c           | LINE    | L1           | 1.04           | 2.43e-33 |
| UCON39          | DNA     | TcMar-Tigger | 1.03           | 7.54e-17 |
| LTR47A2         | LTR     | ERVL         | 1.00           | 1.68e-12 |
| LTR06           | LTR     | ERV1         | 1.00           | 3.02e-08 |
| MamGypsy2-LTR   | LTR     | Gypsy        | 1.00           | 8.44e-22 |
| UCON35          | Unknown | Unknown      | -1.39          | 3.39e-12 |
| HERVK11-int     | LTR     | ERVK         | -1.16          | 2.52e-19 |
| UCON23          | DNA     | hAT-Tip100?  | -1.08          | 1.50e-13 |
| UCON51          | LTR?    | LTR?         | -1.07          | 2.48e-07 |
| LTR23-int       | LTR     | ERV1         | -1.06          | 3.82e-10 |
