# Supplementary material for: Biomarker potential of repetitive-element transcriptome in lung cancer
Source: PubMed Central journal article supplement (PMC6925957; doi:10.7717/peerj.8277), 2019-12-19
Supplement: peerj-07-8277-s003.pdf [file peerj-07-8277-s003.pdf]

**Table S2.** Name, class and family of differentially expressed REs in LUAD together with their  $\logFC_{OE}$  and their statistical significance as an FDR. These data were used in Fig. 3.

| <b>RE</b>      | <b>Class</b> | <b>Family</b> | $\logFC_{OE}$ | <b>FDR</b> |
|----------------|--------------|---------------|---------------|------------|
| HERVL18-int    | LTR          | ERVL          | 2.0           | 1.9e-29    |
| LTR4           | LTR          | ERV1          | 1.4           | 1.5e-34    |
| LTR18A         | LTR          | ERVL          | 1.4           | 2.2e-27    |
| ALR_Alpha      | Satellite    | centr         | 1.3           | 1.9e-19    |
| HERVK11D-int • | LTR          | ERVK          | 1.1           | 5.6e-12    |
| MER65-int      | LTR          | ERV1          | 1.1           | 9.0e-09    |
| HERV3-int      | LTR          | ERV1          | 1.1           | 3.5e-27    |
| UCON80         | DNA          | hAT?          | -1.1          | 3.0e-13    |
| LTR77          | LTR          | ERV1          | -1.1          | 4.5e-26    |
| L1MEa          | LINE         | L1            | -1.2          | 1.2e-35    |
| UCON34         | Unknown      | Unknown       | -1.3          | 6.5e-24    |
| MER126         | DNA          | DNA           | -1.3          | 2.3e-32    |
| UCON26         | Unknown      | Unknown       | -1.4          | 6.1e-35    |
| AluYg6         | SINE         | Alu           | -1.5          | 1.0e-52    |
| LTR18B         | LTR          | ERVL          | -2.1          | 8.8e-59    |

•: Potential LUAD-specific biomarker
