# Supplementary material for: Biomarker potential of repetitive-element transcriptome in lung cancer
Source: PubMed Central journal article supplement (PMC6925957; doi:10.7717/peerj.8277), 2019-12-19
Supplement: peerj-07-8277-s004.pdf [file peerj-07-8277-s004.pdf]

**Table S3.** Expression change by RE family and class in LUAD. The single statistically significant family is marked with an asterisk (\*).

| Family        | LogFC                | FDR                  |
|---------------|----------------------|----------------------|
| centr *       | 1.02108481226983     | 1.51204509066979e-16 |
| Unknown       | -0.640893817333789   | 2.37698556392978e-34 |
| telo          | 0.587989944258578    | 2.84100129717064e-13 |
| DNA           | -0.561270255150791   | 5.89860140844115e-24 |
| hAT-Tag1      | -0.548271509514666   | 1.70909494388762e-11 |
| Dong-R4       | -0.461306954287302   | 4.17593117416971e-08 |
| hAT?          | -0.437732777700732   | 3.45017075072195e-12 |
| hAT           | -0.42999101593034    | 2.33676188933125e-06 |
| MIR           | -0.423120296032459   | 3.09053134460215e-25 |
| Merlin        | 0.423086446506984    | 4.71890722915744e-09 |
| 5S-Deu-L2     | -0.413242910565126   | 1.70909494388762e-11 |
| PiggyBac?     | -0.404708115737808   | 4.68348532916706e-12 |
| DNA?          | -0.378000405050932   | 1.3955267519979e-18  |
| tRNA-Deu      | -0.302739936926857   | 1.7229732452279e-06  |
| ERVK          | 0.283015564829794    | 3.22101423139124e-11 |
| ERV1?         | 0.273221171008698    | 1.28571908180268e-07 |
| hAT-Tip100    | -0.258223271756418   | 2.91978768556969e-17 |
| ERV1          | 0.249986608138221    | 2.7030034760509e-17  |
| Helitron      | 0.247775049966194    | 1.0938501827259e-07  |
| Satellite     | 0.244078933594483    | 0.000023924737594414 |
| TcMar-Mariner | -0.239911392034992   | 1.51204509066979e-16 |
| RTE-BovB      | -0.213923614774419   | 1.6375418852645e-09  |
| hAT-Ac        | -0.210967568481547   | 9.44417060099763e-06 |
| tRNA-RTE      | -0.181183174801822   | 8.16227906510096e-08 |
| MULE-MuDR     | -0.157069061695668   | 0.00802263738351642  |
| TcMar         | -0.153612421169179   | 0.0451093046449653   |
| L1            | 0.138252666345294    | 5.72156164376267e-10 |
| ERVL-MaLR     | 0.12255463413171     | 5.08892198918431e-09 |
| PiggyBac      | 0.111924829071776    | 0.0162061967915319   |
| LTR           | -0.109385877206312   | 0.00774513357306022  |
| hAT-Blackjack | -0.102667254007691   | 0.00220490202258751  |
| L2            | 0.0994118716441634   | 1.28571908180268e-07 |
| Gypsy         | -0.0804251117181345  | 0.0162061967915319   |
| ERVL          | 0.0708430910125176   | 0.00108853834207793  |
| LTR?          | 0.0652496638148965   | 0.0281134479234682   |
| SVA           | 0.0616963154136462   | 0.196997547743618    |
| CR1           | -0.0533832202176372  | 0.00887211655772734  |
| RNA           | 0.0518603237429111   | 0.573219739251327    |
| TcMar-Tigger  | 0.0427522561589533   | 0.0102933365574504   |
| Penelope      | 0.04145445698786     | 0.361781516406121    |
| scRNA         | 0.0401766895232367   | 0.275577045636525    |
| hAT-Tip100?   | -0.0388916266050875  | 0.366118286547699    |
| Gypsy?        | 0.036401481841554    | 0.471533011982807    |
| srpRNA        | 0.0329421066037467   | 0.65995585961405     |
| Alu           | -0.0265189273584598  | 0.275577045636525    |
| Helitron?     | 0.0264441075362418   | 0.718392136946153    |
| RTE-X         | 0.0140616824297084   | 0.626977386032949    |
| ERVL?         | -0.00798590354778424 | 0.843698739800074    |
| hAT-Charlie   | 0.00737844872113679  | 0.626977386032949    |
| TcMar-Tc2     | 0.00548425450210184  | 0.848291930984676    |
| Class         | LogFC                | FDR                  |
| Unknown       | -0.682423513998543   | 3.1957018464701e-33  |
| Satellite     | 0.504615728386989    | 9.27171444710761e-12 |
| DNA?          | -0.418671709965699   | 3.87007447142907e-18 |
| SINE          | -0.219206625716784   | 3.94612281090641e-23 |
| RC            | 0.211102469741813    | 1.49573598665127e-05 |
| LTR           | 0.125537324640516    | 1.12801119510303e-12 |
| LINE          | 0.07148451583775     | 1.81750633992914e-06 |
| DNA           | -0.0610607616989778  | 0.000984893601365505 |
| LTR?          | 0.0252604028615444   | 0.570392798693321    |
| Retroposon    | 0.0212843756478532   | 0.82085838889315     |
| RNA           | 0.015061020268293    | 0.976514125315192    |
| RC?           | -0.0107598645453814  | 0.976514125315192    |
| srpRNA        | -0.00770008133231628 | 0.976514125315192    |
| scRNA         | 0.0010480187031418   | 0.977382102145543    |
