# Supplementary material for: Biomarker potential of repetitive-element transcriptome in lung cancer
Source: PubMed Central journal article supplement (PMC6925957; doi:10.7717/peerj.8277), 2019-12-19
Supplement: peerj-07-8277-s005.pdf [file peerj-07-8277-s005.pdf]

**Table S4.** Name, class and family of differentially down-regulated REs in SCLC together with their  $\logFC_{OE}$  and their statistical significance as an FDR. These data were used in Figures 4 and 5.

| RE              | Class   | Family        | $\logFC_{OE}$ | FDR      |
|-----------------|---------|---------------|---------------|----------|
| LTR7B ●         | LTR     | ERV1          | -3.8          | 1.9e-130 |
| LTR18B ●        | LTR     | ERVL          | -2.8          | 1.8e-22  |
| LTR9C ●         | LTR     | ERV1          | -2.7          | 8.3e-41  |
| UCON26 ●        | Unknown | Unknown       | -2.5          | 9.0e-44  |
| LTR54B ●        | LTR     | ERV1          | -2.5          | 1.9e-41  |
| LTR1B ●         | LTR     | ERV1          | -2.3          | 1.9e-96  |
| HERV1_LTRc ●    | LTR     | ERV1          | -2.2          | 4.1e-25  |
| UCON80 ●        | DNA     | hAT?          | -2.1          | 9.1e-22  |
| MER65-int       | LTR     | ERV1          | -2.0          | 1.2e-07  |
| Ricksha_a ●     | DNA     | MULE-MuDR     | -1.9          | 3.2e-23  |
| ERVL47-int ●    | LTR     | ERVL          | -1.7          | 5.6e-24  |
| ERV24B_Prim-int | LTR     | ERV1          | -1.7          | 1.1e-06  |
| MIRc ●          | SINE    | MIR           | -1.7          | 9.0e-39  |
| UCON34          | Unknown | Unknown       | -1.7          | 1.1e-16  |
| LTR2C ●         | LTR     | ERV1          | -1.6          | 1.4e-26  |
| MER91A ●        | DNA     | hAT-Tip100    | -1.6          | 2.4e-14  |
| UCON14          | DNA?    | DNA?          | -1.5          | 7.5e-09  |
| HERVI-int       | LTR     | ERV1          | -1.5          | 1.2e-15  |
| MLT1E ●         | LTR     | ERVL-MaLR     | -1.5          | 1.6e-27  |
| MER53           | DNA     | hAT           | -1.5          | 1.2e-07  |
| MER126          | DNA     | DNA           | -1.5          | 2.6e-14  |
| UCON67          | Unknown | Unknown       | -1.4          | 5.5e-14  |
| AluYg6 ●        | SINE    | Alu           | -1.4          | 7.8e-15  |
| MIR ●           | SINE    | MIR           | -1.4          | 6.0e-38  |
| AluYk2          | SINE    | Alu           | -1.4          | 2.1e-19  |
| HERVE-int ●     | LTR     | ERV1          | -1.4          | 6.7e-24  |
| MIR3 ●          | SINE    | MIR           | -1.4          | 2.9e-25  |
| LTR39           | LTR     | ERV1          | -1.4          | 1.8e-06  |
| L1MEa           | LINE    | L1            | -1.4          | 9.4e-09  |
| MER61F          | LTR     | ERV1          | -1.3          | 1.3e-13  |
| MER63A          | DNA     | hAT-Blackjack | -1.3          | 2.2e-16  |
| LTR22A          | LTR     | ERVK          | -1.3          | 4.9e-13  |
| LTR27B ●        | LTR     | ERV1          | -1.2          | 3.4e-19  |
| MER39           | LTR     | ERV1          | -1.2          | 2.4e-13  |
| MamRep564 ●     | Unknown | Unknown       | -1.2          | 4.8e-09  |
| Charlie26a      | DNA     | hAT-Charlie   | -1.2          | 3.5e-23  |
| MER57C1         | LTR     | ERV1          | -1.1          | 2.8e-12  |
| UCON39          | DNA     | TcMar-Tigger  | -1.1          | 4.4e-07  |
| L1M2a1          | LINE    | L1            | -1.1          | 5.1e-12  |
| HERV1_LTRd      | LTR     | ERV1          | -1.1          | 5.9e-09  |
| MIRb ●          | SINE    | MIR           | -1.1          | 3.8e-30  |
| LTR57 ●         | LTR     | ERVL          | -1.1          | 9.1e-11  |
| CR1_Mam ●       | LINE    | CR1           | -1.1          | 8.0e-19  |
| LTR81A ●        | LTR     | Gypsy         | -1.1          | 1.8e-19  |
| MER57D ●        | LTR     | ERV1          | -1.1          | 4.6e-18  |
| LTR77           | LTR     | ERV1          | -1.1          | 3.3e-07  |
| Zaphod3 ●       | DNA     | hAT-Tip100    | -1.0          | 1.2e-12  |
| ORSL-2a         | DNA     | hAT-Tip100    | -1.0          | 2.1e-06  |
| MER57F          | LTR     | ERV1          | -1.0          | 7.1e-09  |
| LTR10E          | LTR     | ERV1          | -1.0          | 3.9e-08  |

●: Potential SCLC-specific biomarker
