# Supplementary material for: Biomarker potential of repetitive-element transcriptome in lung cancer
Source: PubMed Central journal article supplement (PMC6925957; doi:10.7717/peerj.8277), 2019-12-19
Supplement: peerj-07-8277-s007.pdf [file peerj-07-8277-s007.pdf]

**Table S6.** Expression change by RE family and class in SCLC. The statistically significant families and class are marked with an asterisk (\*).

| Family        | LogFC                | FDR                   |
|---------------|----------------------|-----------------------|
| telo *        | 1.34854671086538     | 0.0000365481574358304 |
| MIR *         | -1.3261688614074     | 1.3884123315054e-50   |
| centr *       | 1.05324492837102     | 2.42267167955532e-06  |
| hAT *         | -1.02930627386871    | 2.42267167955532e-06  |
| Satellite     | 0.909745955106403    | 1.46940002050509e-08  |
| hAT?          | -0.766581450026728   | 2.42267167955532e-06  |
| Unknown       | -0.552571465313136   | 0.00014476417515476   |
| hAT-Tip100    | -0.509791996488389   | 1.42144278834333e-07  |
| Helitron      | 0.413701520765789    | 0.00893010771018864   |
| TcMar-Tc2     | 0.367602720548       | 0.00331733794267837   |
| hAT-Tag1      | 0.363556845440107    | 0.0963676176539064    |
| PiggyBac      | 0.346499808908819    | 0.0109178279770229    |
| Merlin        | 0.341344257307743    | 0.156770545549572     |
| hAT-Blackjack | -0.329763239017602   | 0.00600238078728352   |
| tRNA-Deu      | -0.285747490223139   | 0.101783103582224     |
| srpRNA        | 0.258615242701252    | 0.532206509664075     |
| LTR           | -0.251722580028142   | 0.156770545549572     |
| ERVK          | 0.248250367060801    | 0.0446314223741959    |
| ERV1?         | -0.247045319676052   | 0.141765597589778     |
| CR1           | -0.23909345344551    | 0.00425465364991257   |
| RTE-BovB      | -0.225802900375445   | 0.0830474849974313    |
| ERV1          | -0.211996988068223   | 0.0143669730312461    |
| DNA           | -0.200541253704206   | 0.205403014944661     |
| Penelope      | 0.197204842443767    | 0.302764586297193     |
| DNA?          | 0.188073343054497    | 0.245618119339655     |
| Gypsy         | 0.186088596198932    | 0.254386374190543     |
| Helitron?     | 0.183148874162789    | 0.320915182784707     |
| LTR?          | 0.156350798058122    | 0.24736784329282      |
| Alu           | -0.150679864141522   | 0.0809298073965674    |
| MULE-MuDR     | -0.149056110264191   | 0.320915182784707     |
| TcMar-Tigger  | 0.143183695583773    | 0.0681266819071531    |
| L2            | -0.139095071094924   | 0.101783103582224     |
| ERV1?         | -0.137261710285251   | 0.31669801926347      |
| Gypsy?        | 0.132942922272655    | 0.532206509664075     |
| tRNA-RTE      | -0.131693324227164   | 0.337813649829251     |
| RTE-X         | -0.106885571631967   | 0.411291624353563     |
| RNA           | -0.101641194551597   | 0.761030057928728     |
| TcMar         | -0.0966746515967049  | 0.718277544705426     |
| scRNA         | -0.088792512065464   | 0.590931997035589     |
| ERV1-MaLR     | 0.0881273412465159   | 0.250074331780613     |
| L1            | 0.0860287993663588   | 0.254386374190543     |
| 5S-Deu-L2     | -0.0853981789182889  | 0.639756878021122     |
| SVA           | -0.0846774146834285  | 0.639956367603783     |
| hAT-Tip100?   | -0.0740951295365135  | 0.639956367603783     |
| hAT-Ac        | -0.0614123616718557  | 0.643251914778013     |
| Dong-R4       | 0.0607717447179489   | 0.735820162917559     |
| ERV1          | 0.0400310660989352   | 0.643251914778013     |
| TcMar-Mariner | 0.0392456665434142   | 0.735820162917559     |
| hAT-Charlie   | -0.0251788579976489  | 0.718277544705426     |
| PiggyBac?     | 0.0147638290216924   | 0.919150949917058     |
| Class         | LogFC                | FDR                   |
| Satellite *   | 1.13241956464061     | 2.57583142433929e-11  |
| SINE          | -0.509932859935055   | 1.94196950632935e-21  |
| RC            | 0.491867461627475    | 0.00782212265726685   |
| Unknown       | -0.472629622743312   | 0.00782212265726685   |
| srpRNA        | 0.332201800283961    | 0.360910107515738     |
| DNA?          | 0.268027204514469    | 0.176155270922065     |
| RC?           | 0.262444404272404    | 0.269764975529134     |
| LTR?          | 0.235896972771357    | 0.23082925424634      |
| LINE          | 0.0765135243686261   | 0.305354675208497     |
| LTR           | 0.0644511589032332   | 0.360910107515738     |
| DNA           | 0.0636208723784573   | 0.360910107515738     |
| RNA           | -0.03001644912745    | 0.969620848217942     |
| scRNA         | -0.00861310661197422 | 0.969620848217942     |
| Retroposon    | -0.00577735490482679 | 0.969620848217942     |
